# Supplementary material
Source: PubMed Central journal article supplement (PMC7393997)

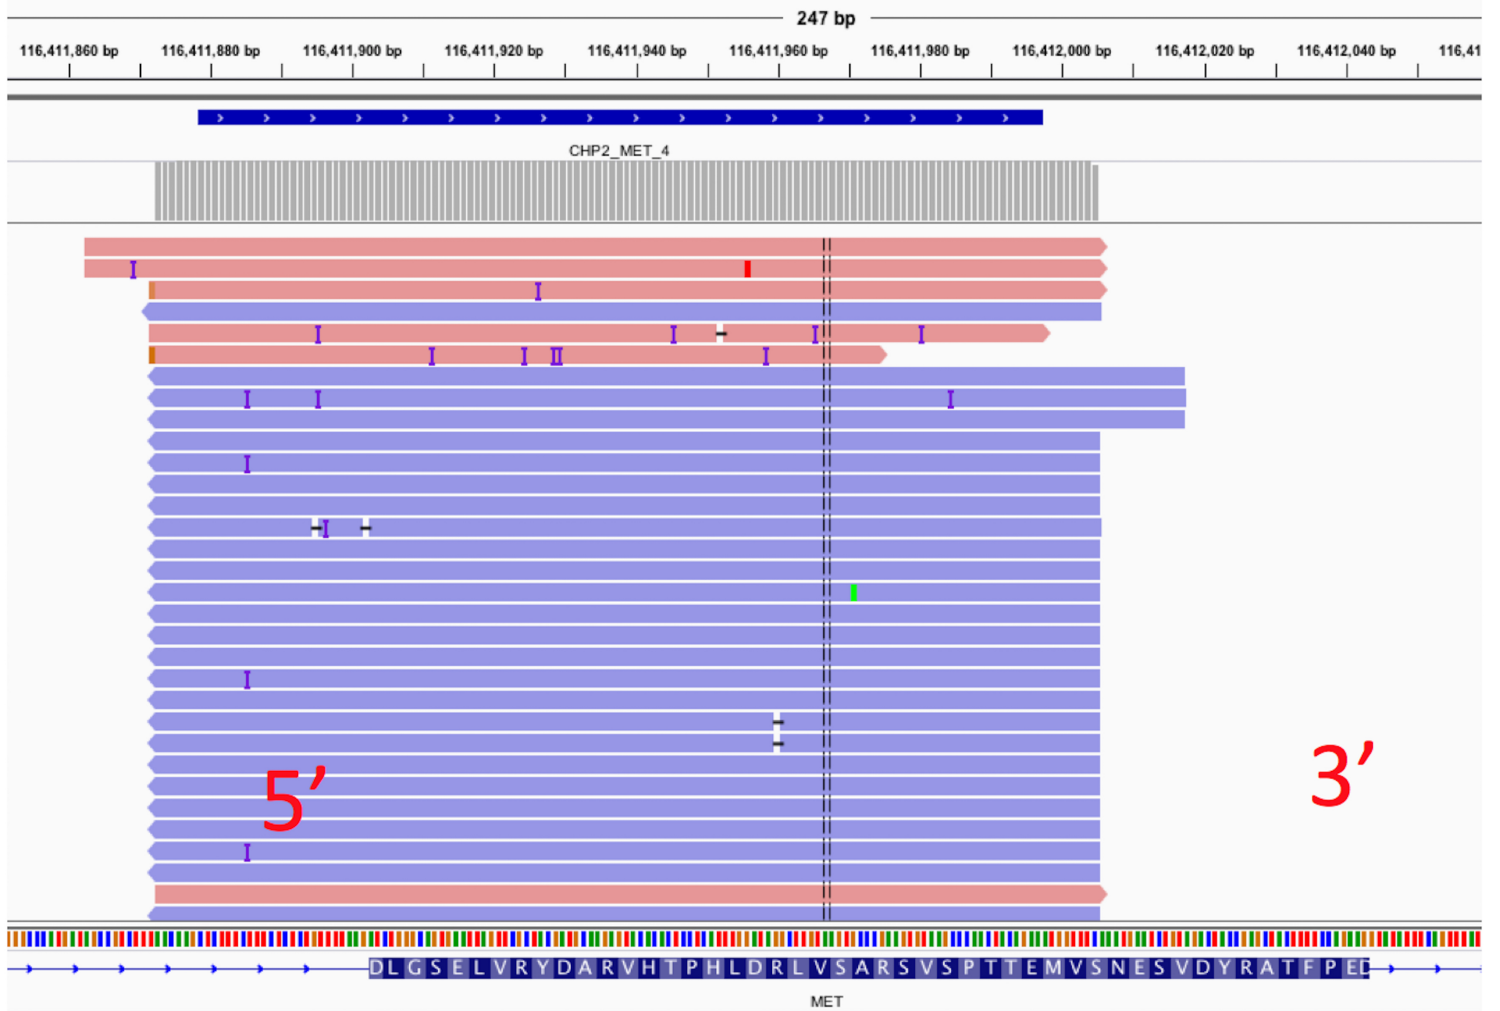

Supplement: NIHMS1592866-supplement-Supplemental_Information.pdf [file NIHMS1592866-supplement-Supplemental_Information.pdf]
